# Supplementary material
Source: HighWire-hosted journal article supplement (https://heart.bmj.com/content/heartjnl-2016-310746)
Supplement: inline-supplementary-material-1 [file inline-supplementary-material-1.pdf]

**Table 1, Supplemental material. Hazard ratios with 95% confidence intervals, in different age groups, for all-cause mortality, heart failure, and myocardial infarction in relation presence or absence of treatment for erectile dysfunction.**

|                                                      | All-cause mortality                  |                                 | Heart failure                        |                                 | Myocardial infarction                |                                 |
|------------------------------------------------------|--------------------------------------|---------------------------------|--------------------------------------|---------------------------------|--------------------------------------|---------------------------------|
| <i>Age &lt; 60 years</i>                             |                                      |                                 |                                      |                                 |                                      |                                 |
| Subjects in analysis <sup>a</sup>                    | <b>No ED treatment</b><br>(n=12 609) | <b>ED treatment</b><br>(n=1273) | <b>No ED treatment</b><br>(n=12 632) | <b>ED treatment</b><br>(n=1250) | <b>No ED treatment</b><br>(n=12 658) | <b>ED treatment</b><br>(n=1224) |
| Number of cases (%)                                  | 385 (3.1)                            | 28 (2.2)                        | 319 (2.5)                            | 12 (1.0)                        | 701 (5.5)                            | 40 (3.3)                        |
| Incidence rate                                       | 0.86 (0.78-0.95)                     | 0.87 (0.60-1.26)                | 0.72 (0.65-0.81)                     | 0.38 (0.22-0.67)                | 1.63 (1.51-1.76)                     | 1.32 (0.97-1.80)                |
| Unadjusted, HR (95% CI)                              | Referent                             | 1.08 (0.73-1.60)                | Referent                             | 0.90 (0.50-1.62)                | Referent                             | 1.10 (0.80-1.52)                |
| Age-adjusted, HR (95% CI)                            | Referent                             | 1.06 (0.72-1.56)                | Referent                             | 0.89 (0.50-1.60)                | Referent                             | 1.10 (0.80-1.52)                |
| Multivariable adjusted <sup>b</sup> , HR<br>(95% CI) | Referent                             | 1.05 (0.71-1.56)                | Referent                             | 0.89 (0.49-1.60)                | Referent                             | 1.10 (0.79-1.52)                |
| <i>Age 60-69 years</i>                               |                                      |                                 |                                      |                                 |                                      |                                 |
| Subjects in analysis <sup>a</sup>                    | <b>No ED treatment</b><br>(n=13 733) | <b>ED treatment</b><br>(n=1296) | <b>No ED treatment</b><br>(n=13 764) | <b>ED treatment</b><br>(n=1265) | <b>No ED treatment</b><br>(n=13 787) | <b>ED treatment</b><br>(n=1242) |
| Number of cases (%)                                  | 1146 (8.3)                           | 55 (4.2)                        | 653 (4.7)                            | 16 (1.3)                        | 974 (7.1)                            | 39 (3.1)                        |

|                                                   |                  |                  |                  |                  |                  |                  |
|---------------------------------------------------|------------------|------------------|------------------|------------------|------------------|------------------|
| Incidence rate                                    | 2.44 (2.30-2.58) | 1.65 (1.27-2.15) | 1.43 (1.32-1.54) | 0.49 (0.30-0.80) | 2.18 (2.04-2.32) | 1.25 (0.91-1.71) |
| Unadjusted, HR (95% CI)                           | Referent         | 0.72 (0.54-0.94) | Referent         | 0.58 (0.35-0.96) | Referent         | 0.88 (0.63-1.22) |
| Age-adjusted, HR (95% CI)                         | Referent         | 0.73 (0.56-0.96) | Referent         | 0.58 (0.35-0.97) | Referent         | 0.88 (0.64-1.22) |
| Multivariable adjusted <sup>b</sup> , HR (95% CI) | Referent         | 0.85 (0.65-1.12) | Referent         | 0.66 (0.40-1.09) | Referent         | 0.94 (0.68-1.30) |

*Age 70-80 years*

| Subjects in analysis <sup>a</sup>                 | No ED treatment<br>(n=13 735) | ED treatment<br>(n=499) | No ED treatment<br>(n=13 748) | ED treatment<br>(n=486) | No ED treatment<br>(n=13 753) | ED treatment<br>(n=481) |
|---------------------------------------------------|-------------------------------|-------------------------|-------------------------------|-------------------------|-------------------------------|-------------------------|
| Number of cases (%)                               | 3210 (23.3)                   | 29 (5.8)                | 1431 (10.4)                   | 13 (2.7)                | 1414 (10.3)                   | 20 (4.2)                |
| Incidence rate                                    | 7.63 (7.37-7.90)              | 2.25 (1.57-3.24)        | 3.60 (3.42-3.79)              | 1.04 (0.61-1.80)        | 3.60 (3.41-3.79)              | 1.64 (1.06-2.55)        |
| Unadjusted, HR (95% CI)                           | Referent                      | 0.31 (0.22-0.45)        | Referent                      | 0.41 (0.24-0.71)        | Referent                      | 0.72 (0.46-1.13)        |
| Age-adjusted, HR (95% CI)                         | Referent                      | 0.36 (0.25-0.52)        | Referent                      | 0.45 (0.26-0.77)        | Referent                      | 0.77 (0.49-1.20)        |
| Multivariable adjusted <sup>b</sup> , HR (95% CI) | Referent                      | 0.41 (0.28-0.59)        | Referent                      | 0.51 (0.30-0.89)        | Referent                      | 0.83 (0.53-1.29)        |

---

Abbreviations: ED, erectile dysfunction; HR, hazard ratio; CI, confidence interval; MI, myocardial infarction; MACE, major adverse cardiac event (includes hospital stay for MI, heart failure or revascularisation) Incidence rate is given per 100 person-years. <sup>a</sup>Numbers do not sum up to group total since subjects can be included in the No ED category initially and later change to the ED category. <sup>b</sup>Adjusted for all variables in Table 1. Incidence rates are cases per 100 person-years.
