# Supplementary material
Source: HighWire-hosted journal article supplement (https://heart.bmj.com/content/heartjnl-2016-310746)
Supplement: inline-supplementary-material-2 [file inline-supplementary-material-2.pdf]

**Table 2, Supplemental material. Hazard ratios with 95% confidence intervals, in different age groups, for revascularisation, MACE, cardiovascular death, and non cardiovascular death, in relation to presence or absence of treatment for erectile dysfunction.**

|                                                   | Revascularisation                          |                                        | MACE                                       |                                        | Cardiovascular death                       |                                        | Non cardiovascular death                   |                                        |
|---------------------------------------------------|--------------------------------------------|----------------------------------------|--------------------------------------------|----------------------------------------|--------------------------------------------|----------------------------------------|--------------------------------------------|----------------------------------------|
| <i>Age &lt; 60 years</i>                          |                                            |                                        |                                            |                                        |                                            |                                        |                                            |                                        |
| Subjects in analysis <sup>a</sup>                 | <b>No ED treatment</b><br><b>(n=12769)</b> | <b>ED treatment</b><br><b>(n=1113)</b> | <b>No ED treatment</b><br><b>(n=12799)</b> | <b>ED treatment</b><br><b>(n=1083)</b> | <b>No ED treatment</b><br><b>(n=12609)</b> | <b>ED treatment</b><br><b>(n=1273)</b> | <b>No ED treatment</b><br><b>(n=12609)</b> | <b>ED treatment</b><br><b>(n=1273)</b> |
| Number of cases (%)                               | 1811 (14.2)                                | 48 (4.3)                               | 2195 (17.1)                                | 57 (5.3)                               | 178 (1.4)                                  | 10 (0.8)                               | 207 (1.6)                                  | 18 (1.4)                               |
| Incidence rate                                    | 4.60 (4.39-4.81)                           | 1.78 (1.34-2.36)                       | 5.71 (5.48-5.95)                           | 2.17 (1.68-2.82)                       | 0.40 (0.34-0.46)                           | 0.31 (0.17-0.58)                       | 0.46 (0.40-0.53)                           | 0.56 (0.35-0.89)                       |
| Unadjusted, HR (95% CI)                           | Referent                                   | 0.83 (0.62-1.11)                       | Referent                                   | 0.80 (0.61-1.04)                       | Referent                                   | 0.87 (0.46-1.67)                       | Referent                                   | 1.25 (0.77-2.04)                       |
| Age-adjusted, HR (95% CI)                         | Referent                                   | 0.83 (0.62-1.11)                       | Referent                                   | 0.79 (0.60-1.03)                       | Referent                                   | 0.85 (0.45-1.63)                       | Referent                                   | 1.23 (0.75-2.00)                       |
| Multivariable adjusted <sup>b</sup> , HR (95% CI) | Referent                                   | 0.80 (0.60-1.07)                       | Referent                                   | 0.77 (0.59-1.00)                       | Referent                                   | 0.86 (0.45-1.65)                       | Referent                                   | 1.21 (0.74-1.98)                       |
| <i>Age 60-69 years</i>                            |                                            |                                        |                                            |                                        |                                            |                                        |                                            |                                        |
| Subjects in analysis <sup>a</sup>                 | <b>No ED treatment</b><br><b>(n=13876)</b> | <b>ED treatment</b><br><b>(n=1153)</b> | <b>No ED treatment</b><br><b>(n=13908)</b> | <b>ED treatment</b><br><b>(n=1121)</b> | <b>No ED treatment</b><br><b>(n=13733)</b> | <b>ED treatment</b><br><b>(n=1296)</b> | <b>No ED treatment</b><br><b>(n=13733)</b> | <b>ED treatment</b><br><b>(n=1296)</b> |
| Number of cases (%)                               | 1948 (14.0)                                | 60 (5.3)                               | 2722 (19.6)                                | 77 (6.9)                               | 489 (3.6)                                  | 24 (1.9)                               | 657 (4.8)                                  | 31 (2.4)                               |
| Incidence rate                                    | 4.70 (4.49-4.91)                           | 2.11 (1.64-2.72)                       | 6.85 (6.59-7.11)                           | 2.80 (2.34-3.50)                       | 1.04 (0.95-1.14)                           | 0.72 (0.48-1.08)                       | 1.40 (1.29-1.51)                           | 0.93 (0.66-1.33)                       |
| Unadjusted, HR (95% CI)                           | Referent                                   | 1.02 (0.79-1.33)                       | Referent                                   | 0.87 (0.69-1.09)                       | Referent                                   | 0.74 (0.49-1.12)                       | Referent                                   | 0.70 (0.48-1.00)                       |
| Age-adjusted, HR (95% CI)                         | Referent                                   | 1.02 (0.79-1.33)                       | Referent                                   | 0.87 (0.69-1.10)                       | Referent                                   | 0.76 (0.50-1.14)                       | Referent                                   | 0.71 (0.49-1.02)                       |

CI)

Multivariable adjusted<sup>b</sup>, Referent 1.05 (0.81-1.37) Referent 0.92 (0.73-1.16) Referent 0.91 (0.60-1.37) Referent 0.82 (0.57-1.18)  
HR (95% CI)

*Age ≥ 70 years*

| Subjects in analysis <sup>a</sup> | No ED treatment<br>(n=13798) | ED treatment<br>(n=436) | No ED treatment<br>(n=13815) | ED treatment<br>(n=419) | No ED treatment<br>(n=13735) | ED treatment<br>(n=499) | No ED treatment<br>(n=13735) | ED treatment<br>(n=499) |
|-----------------------------------|------------------------------|-------------------------|------------------------------|-------------------------|------------------------------|-------------------------|------------------------------|-------------------------|
| Number of cases (%)               | 1622 (11.8)                  | 22 (5.0)                | 3400 (24.6)                  | 37 (8.8)                | 1484 (10.8)                  | 11 (2.2)                | 1726 (12.6)                  | 18 (3.6)                |
| Incidence rate                    | 4.31 (4.11-4.53)             | 2.04 (1.34-3.10)        | 9.83 (9.50-10.16)            | 3.61 (2.62-4.98)        | 3.53 (3.35-3.71)             | 0.85 (0.47-1.54)        | 4.10 (3.91-4.30)             | 1.40 (0.88-2.22)        |
| Unadjusted, HR (95%<br>CI)        | Referent                     | 1.08 (0.70-1.65)        | Referent                     | 0.68 (0.49-0.94)        | Referent                     | 0.27 (0.15-0.49)        | Referent                     | 0.35 (0.22-0.56)        |

CI)

Age-adjusted, HR (95% CI) Referent 1.04 (0.68-1.59) Referent 0.70 (0.50-0.97) Referent 0.31 (0.17-0.57) Referent 0.39 (0.25-0.62)

CI)

Multivariable adjusted<sup>b</sup>, Referent 1.02 (0.67-1.57) Referent 0.76 (0.55-1.05) Referent 0.36 (0.20-0.66) Referent 0.44 (0.27-0.69)  
HR (95% CI)

---

Abbreviations: ED, erectile dysfunction; HR, hazard ratio; CI, confidence interval; MI, myocardial infarction; MACE, major adverse cardiac event (includes hospital stay for MI, heart failure or revascularisation)  
Incidence rate is given per 100 person-years. <sup>a</sup>Numbers do not sum up to group total since subjects can be included in the No ED treatment category initially and later change to the ED treatment category. <sup>b</sup>Adjusted for all variables in Table 1. Incidence rates are cases per 100 person-years.
